# Supplementary material for: Diversification of ergot alkaloids and heritable fungal symbionts in morning glories
Source: bioRxiv or medRxiv preprint supplement (doi:10.1101/2021.06.09.447740), 2021-11-01
Supplement: Supplementary file [file media-1.pdf]

## Supplementary Materials for: Diversification of ergot alkaloids and heritable fungal symbionts in morning glories

Wesley T. Beaulieu, Daniel G. Panaccione, Quynh N. Quach, Richard E. Miller, Katy L. Smoot, Keith Clay

Correspondence to: [clay@tulane.edu](mailto:clay@tulane.edu)

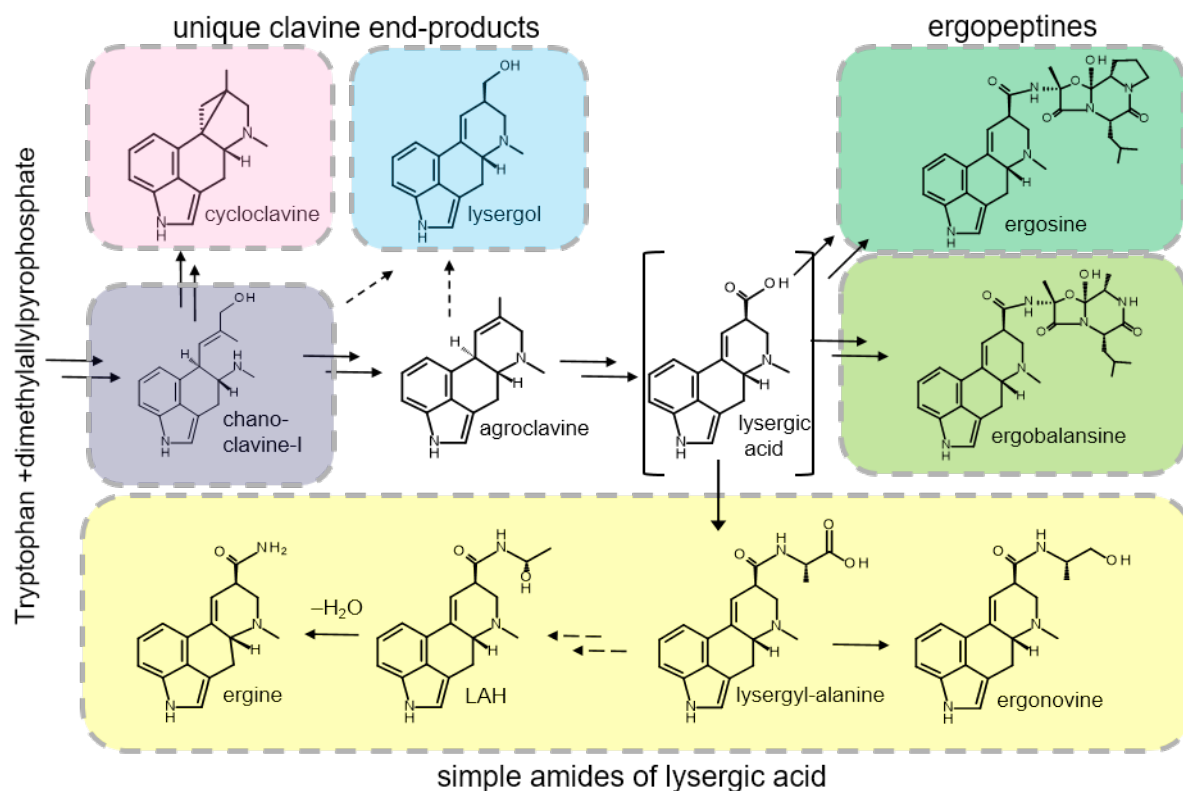

**Figure S1.** Diversification of EAs produced in Convolvulaceae-*Periglandula* symbioses. Double arrows indicate one or more omitted intermediates. Dashed arrows indicate uncharacterized steps. Lysergic acid is bracketed to indicate that it is not typically considered a clavine and, as a transient intermediate, typically is not detected in analyses. Colored boxes represent the six distinct EA chemotypes used in PCAs (See Materials and Methods).

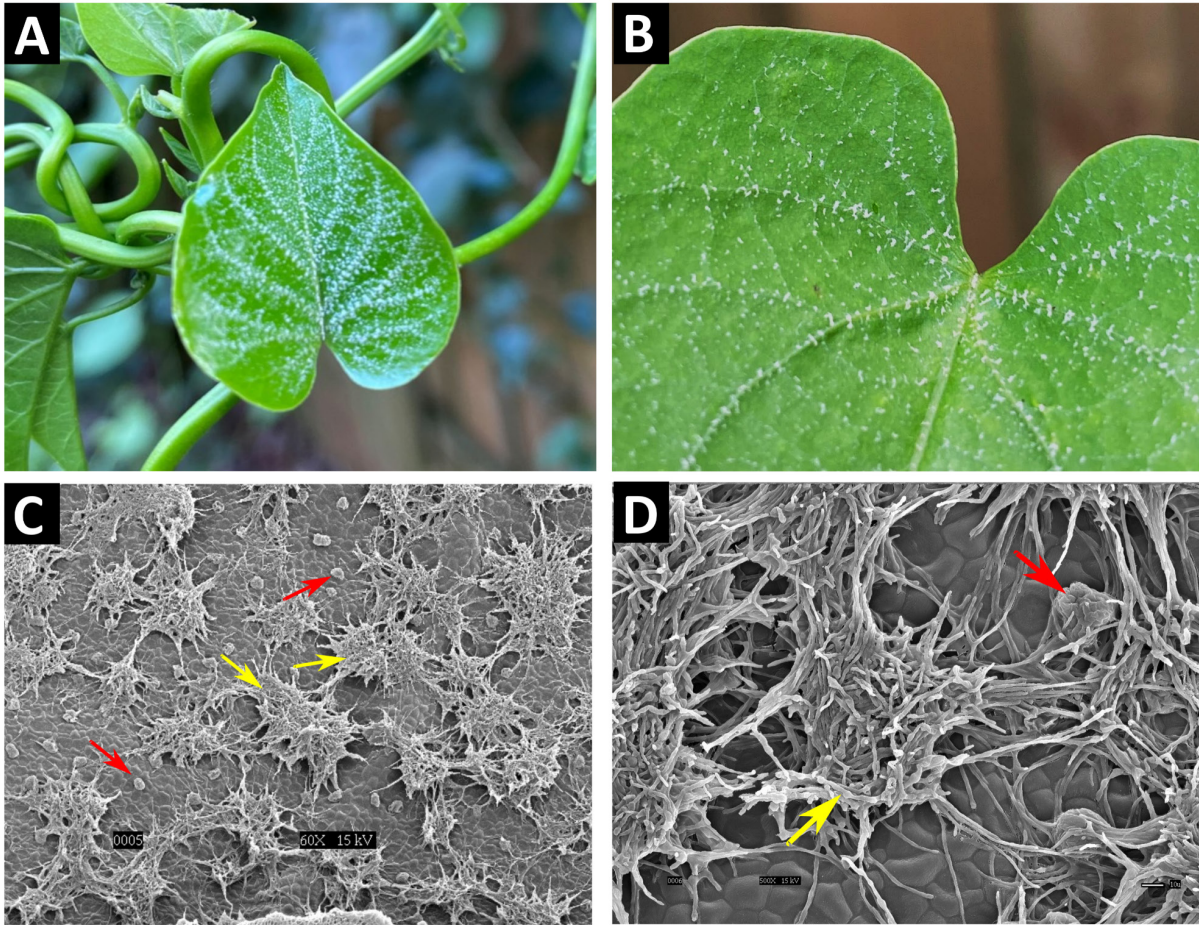

**Figure S2. Epiphytic fungal colonies.** A,B) Colonies growing along the leaf veins of *Ipomoea corymbosa*. C,D) Scanning electron microscope images of fungal colonies (indicated by yellow arrows) closely associated with oil glands (indicated by red arrows).

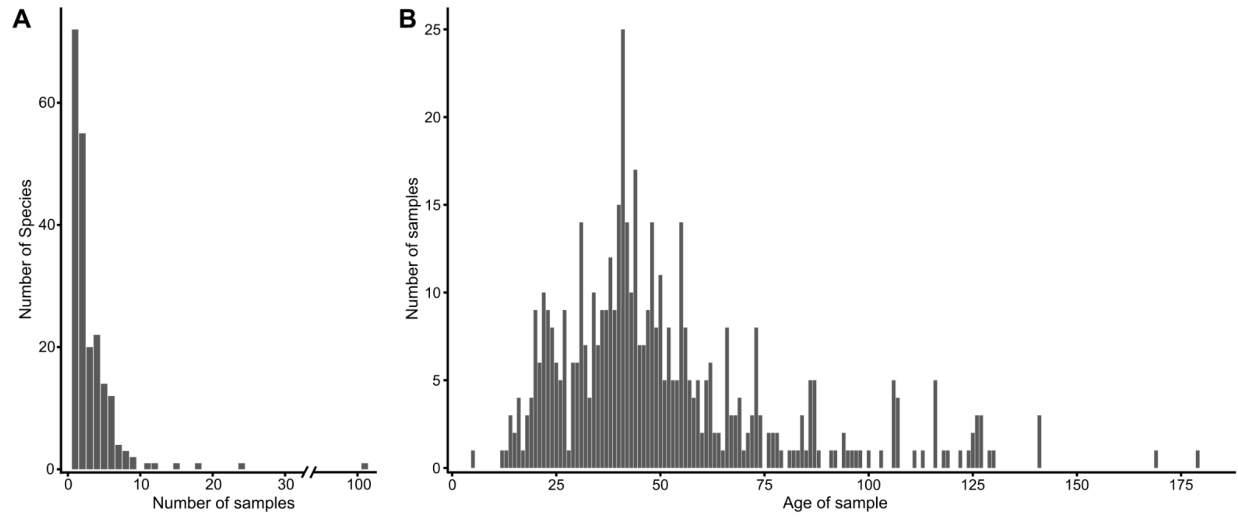

**Figure S3. Sample and sample age distribution. A)** Sample distribution among surveyed species; **B)** Sample age distribution among samples with an available year of collection.

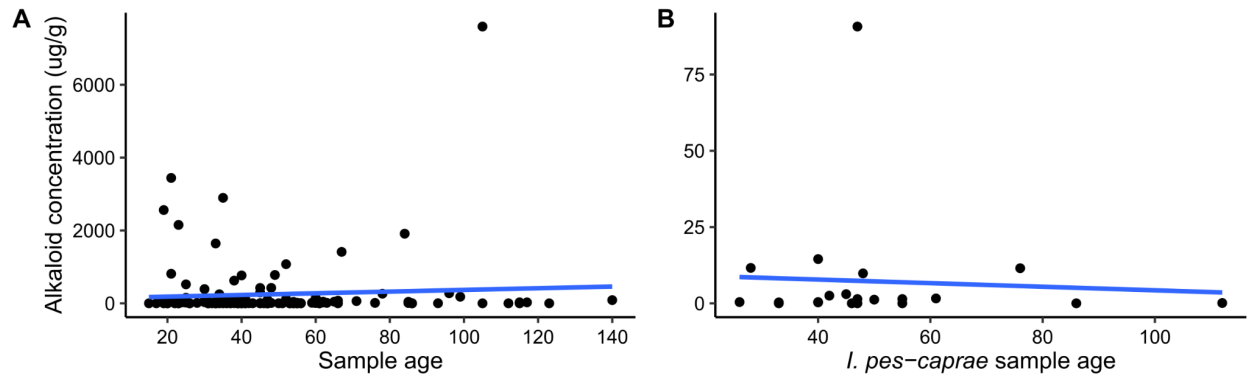

**Figure S4.** Ergot alkaloid concentration variation based on sample age in **A)** all EA+ samples, and **B)** *Ipomoea pes-caprae*.

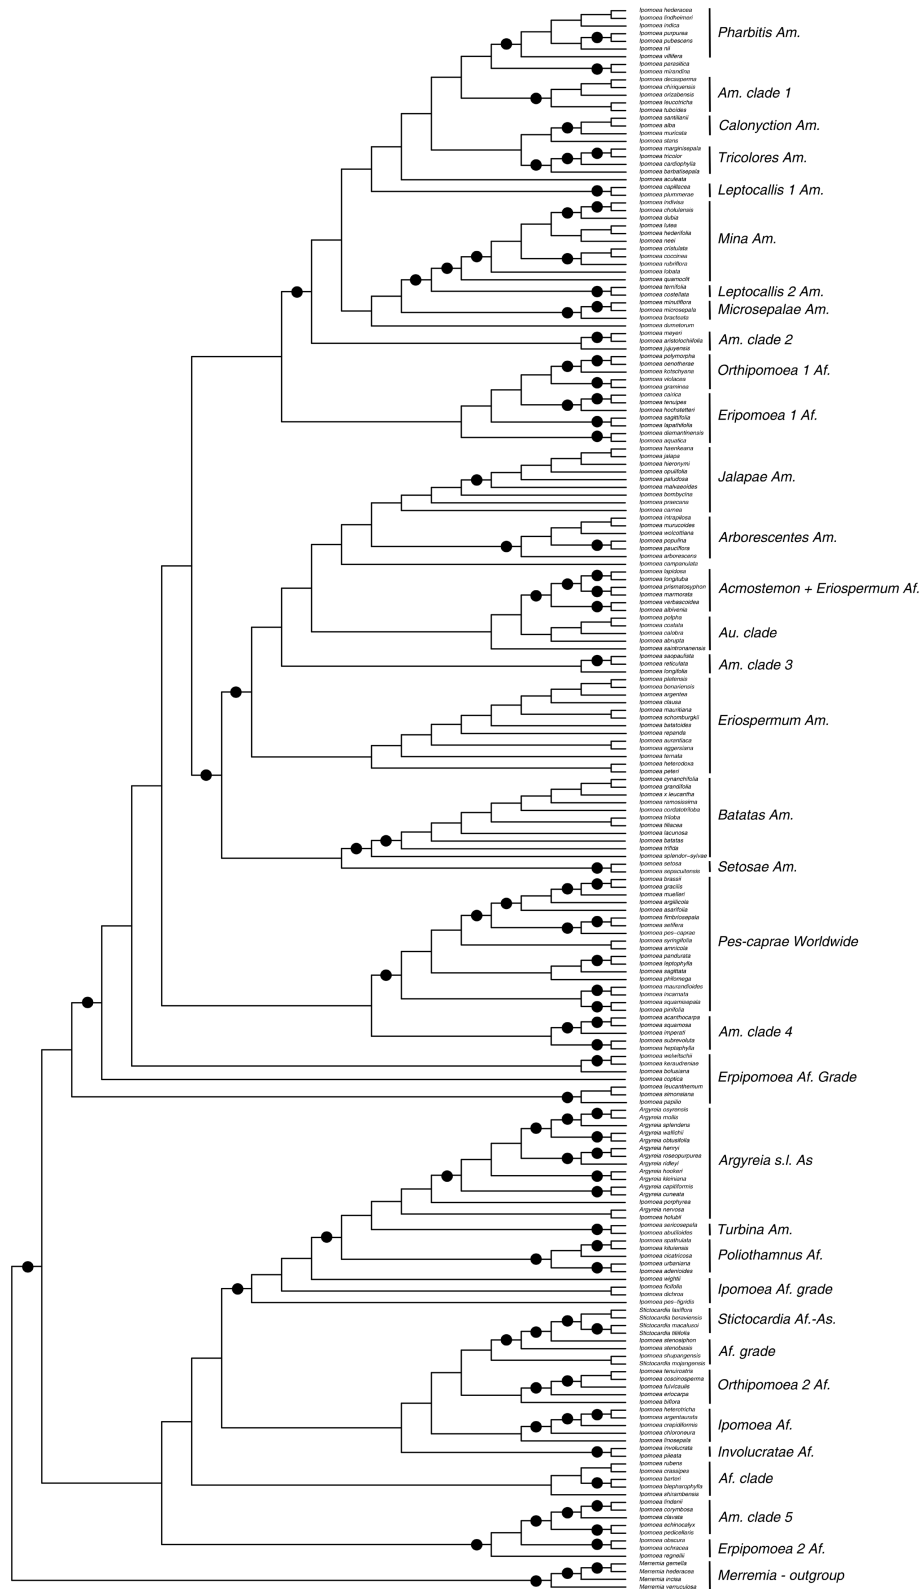

**Figure S5.** Maximum likelihood ITS phylogeny with clade denotation. Nodes with bootstrap support >75 are represented by a black circle. Af, African; Am, American; As, Asian; Au, Australian.

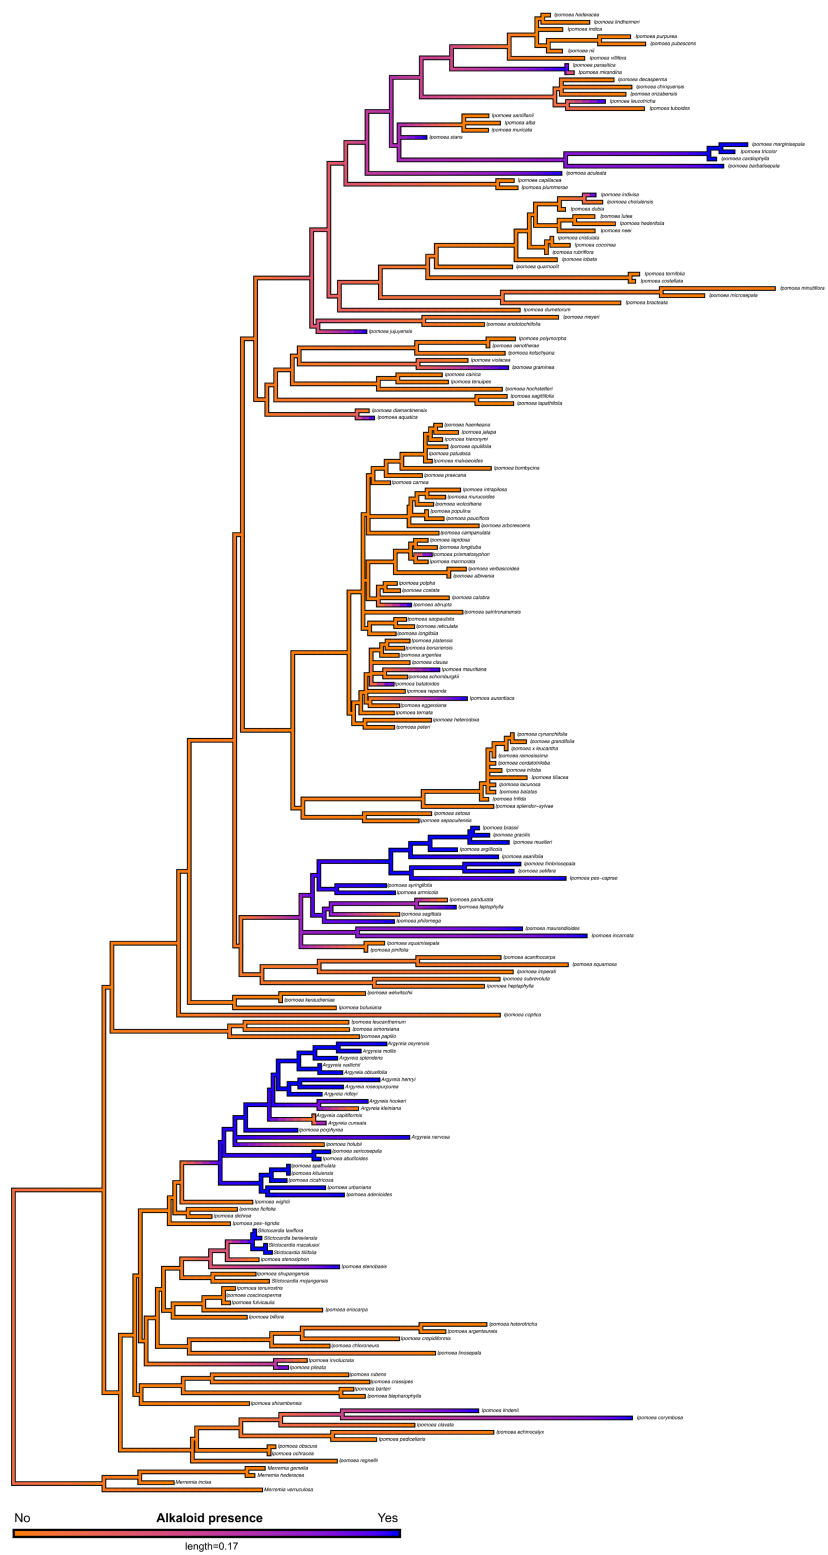

**Figure S6.** Density map of Bayesian stochastic character probabilities of alkaloid positive (blue) and alkaloid negative (orange) character states. Legend length equals units of substitution per site.

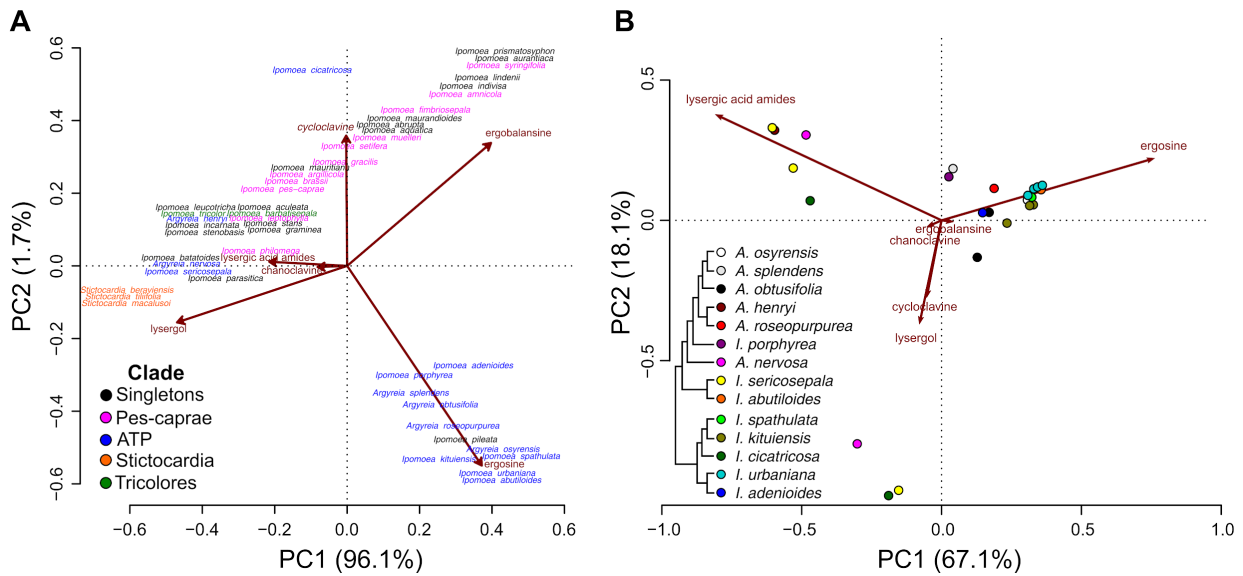

**Figure S7.** Clustering of alkaloid chemotypes in alkaloid-positive species. **A)** Phylogenetic PCA showing differences in EA profile of different clades of morning glory, represented by different colors. Alkaloid values are averaged for each species. “Singletons” are clades with only one positive taxa each. **B)** PCA showing differences in EA profiles of different species in the ATP clade.

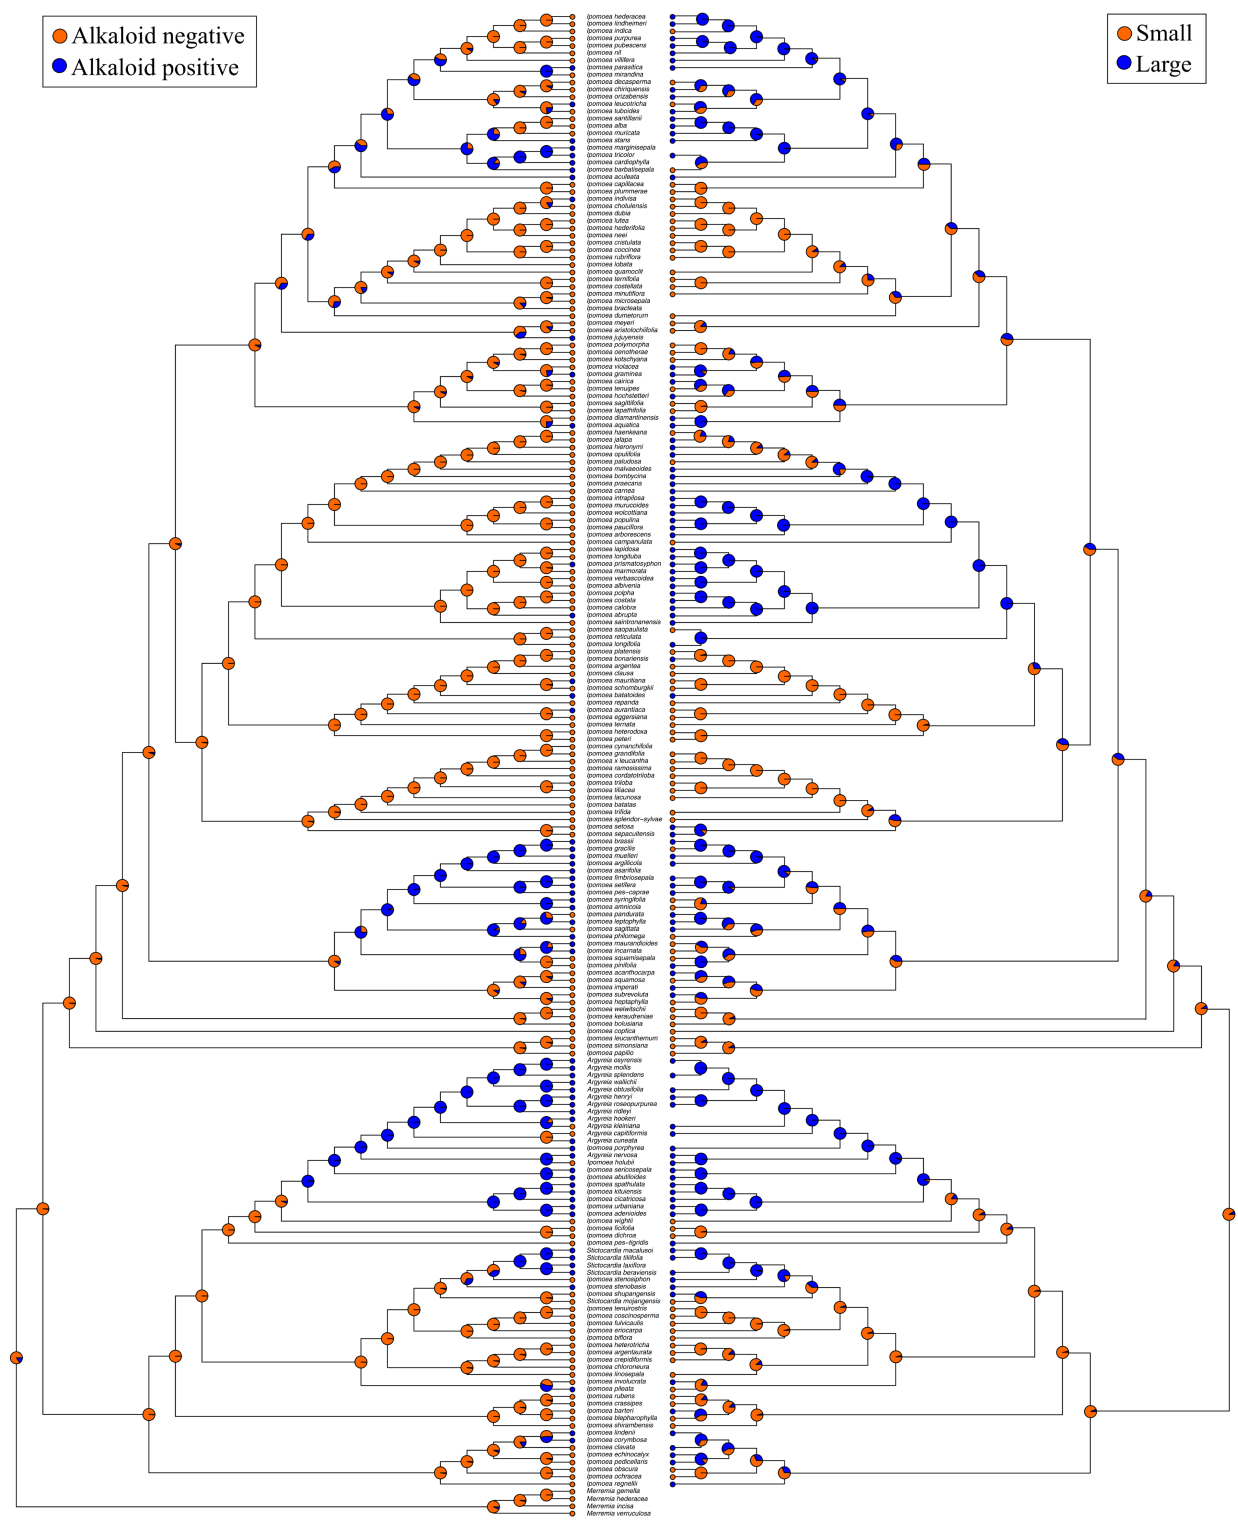

**Figure S8.** Comparison of the ancestral state reconstruction of alkaloid presence (left) and seed size (right). Circles at the tips represent current state and pie charts at nodes indicate the relative probability of the ancestral character state.



**Figure S9.** ITS phylogeny of morning glories with EAs. ITS phylogeny adapted from Munoz et al.<sup>27</sup> colorized with our EA data. Orange species are EA- and blue species are EA+. Available at <https://doi.org/10.6084/m9.figshare.14749512>.

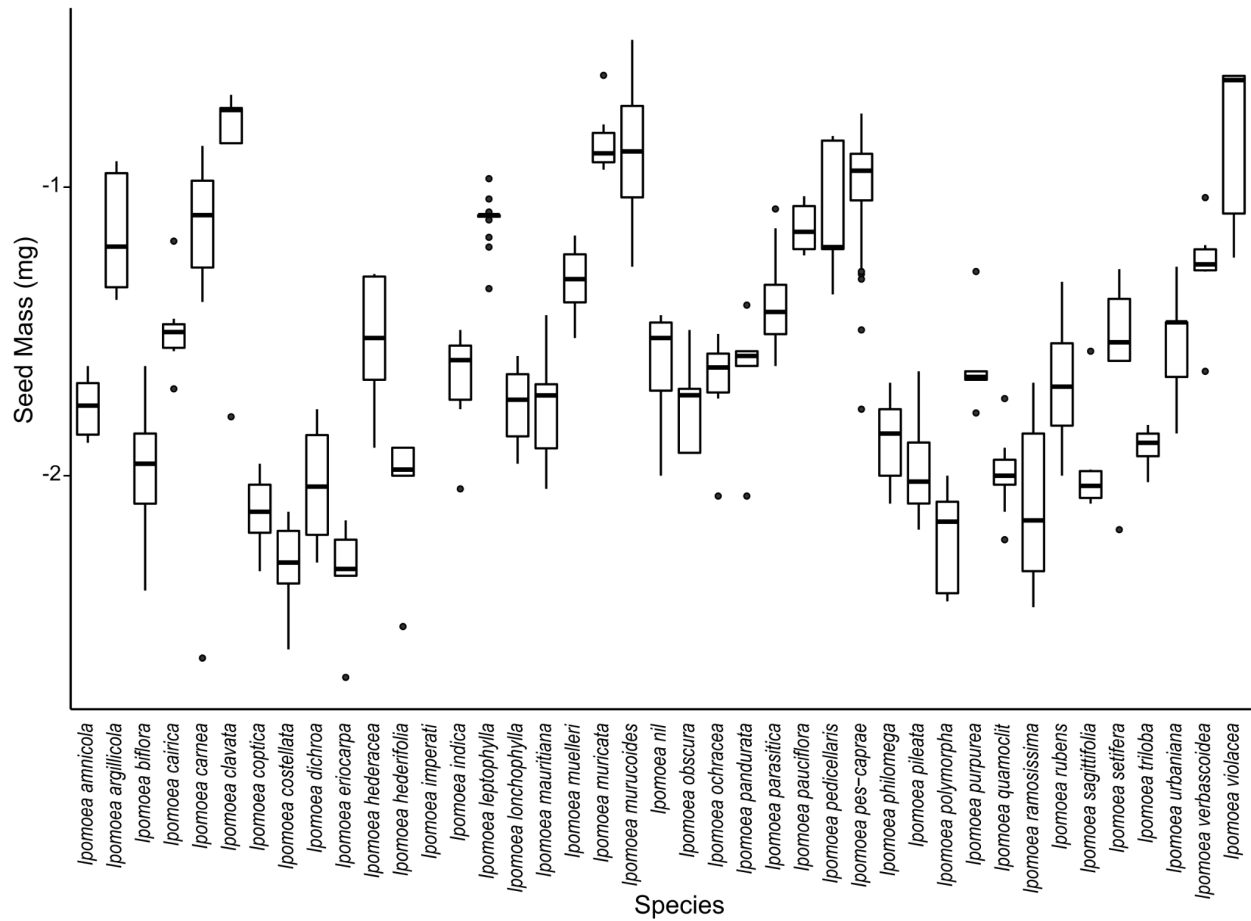

**Figure S10.** Seed mass variation in species with five or more samples. Seed mass were log<sub>10</sub> transformed.

**Table S1. Sampling information and results.** Naming authority and geographic information were collected from the World Checklist of Selected Families at <https://wcsp.science.kew.org>.

| Species                              | Authority                             | Number of Accessions | Number of Accessions with Ergot Alkaloids | Average Ergot Alkaloid Concentration ( $\mu\text{g/g}$ ) | Average Latitude | Average Seed Mass | Previous Designation (Eich 2008) | Geographical Distribution                                       |
|--------------------------------------|---------------------------------------|----------------------|-------------------------------------------|----------------------------------------------------------|------------------|-------------------|----------------------------------|-----------------------------------------------------------------|
| <i>A. capitiformis</i>               | (Poir.) Ooststr                       | 2                    | 0                                         |                                                          | 19.1             | 38                |                                  |                                                                 |
| <i>A. henryi</i> <sup>†</sup>        | (Craib) Craib                         | 2                    | 2                                         | 67.1                                                     | 19.1             | 48                |                                  | China to N. Thailand                                            |
| <i>A. hirsuta</i>                    | Wight Arn.                            | 1                    | 0                                         |                                                          | 7.5              | 110               |                                  |                                                                 |
| <i>A. hirsutissima</i>               | (C.B.Clarke) Thoth.                   | 1                    | 0                                         |                                                          | 22.2             | 34                |                                  |                                                                 |
| <i>A. kleiniana</i>                  | (Schult.) Raizada                     | 1                    | 0                                         |                                                          | 7.5              | 79                |                                  |                                                                 |
| <i>A. nervosa</i>                    | (Burm.f.) Bojer                       | 2                    | 2                                         | 46                                                       | 20.55            | 54                | Positive                         | India to Myanmar                                                |
| <i>A. obtusifolia</i>                | Lour.                                 | 4                    | 2                                         | 94.2                                                     | 22.1             | 50.5              | Positive                         | S. China to Indo-China                                          |
| <i>A. osyrensis</i> <sup>†</sup>     | (Roth) Choisy                         | 1                    | 1                                         | 117.1                                                    | 13               | 27                |                                  | S. India to Hainan and N. Sumatera                              |
| <i>A. roseopurpurea</i> <sup>†</sup> | (Kerr) Ooststr.                       | 1                    | 1                                         | 181.8                                                    | 7.6              | 99                |                                  | Thailand to Malaysia                                            |
| <i>A. splendens</i>                  | (Hornem.) Sweet                       | 1                    | 1                                         | 877.6                                                    | 24.3             | 153               | Positive                         | N.E. India to China                                             |
| <i>D. dissectus</i>                  | (Jacq.) A.R.Simões & Staples          | 1                    | 0                                         |                                                          | -19              | 4                 |                                  |                                                                 |
| <i>I. abrupta</i> <sup>†</sup>       | R. Br.                                | 1                    | 1                                         | 26.7                                                     | -13.5            | 30                |                                  | N. & NE. Australia                                              |
| <i>I. abutiloides</i>                | (Kunth) G.Don                         | 2                    | 1                                         | 248.8                                                    | 4.2              | 94                | Positive                         | Panama to S. Trop. America                                      |
| <i>I. acanthocarpa</i>               | (Choisy) Hochst. ex Schweinf. & Asch. | 4                    | 0                                         |                                                          | 13.525           | 38.25             |                                  |                                                                 |
| <i>I. aculeata</i> <sup>†</sup>      | Blume                                 | 1                    | 1                                         | 529.3                                                    | -23.2            | 137               |                                  | SW. India, Bangladesh to Hainan and Malesia, N. & E. Queensland |
| <i>I. adenioides</i> <sup>†</sup>    | Schinz                                | 1                    | 1                                         | 9                                                        | -22.1            | 39                | Devoid                           | S. Trop. & S. Africa                                            |

|                             |                                     |    |   |        |       |      |               |                                          |
|-----------------------------|-------------------------------------|----|---|--------|-------|------|---------------|------------------------------------------|
| <i>I. alba</i>              | L.                                  | 1  | 0 |        |       | 215  | Devoid        |                                          |
| <i>I. albivenia</i>         | (Lindl.) Sweet                      | 2  | 0 |        | -17   | 72   | Devoid        |                                          |
| <i>I. alexandrae</i>        | D.F.Austin                          | 1  | 0 |        |       | 36   |               |                                          |
| <i>I. amnicola</i>          | Morong                              | 8  | 7 | 430.2  | 18.3  | 18   | Positive      | W. & S. South America to Brazil          |
| <i>I. anisomeres</i>        | B.L.Rob. & Bartlett                 | 2  | 0 |        | -4.1  | 20   |               |                                          |
| <i>I. antonschmidii</i> †   | R.W.Johnson                         | 1  | 1 | 22.9   | -18.7 | 29   |               | NC. Northern Territory to NW. Queensland |
| <i>I. aquatica</i> †        | Forssk.                             | 4  | 2 | 99.8   | 2.7   | 43   | Contradictory | Tropical & Subtropical Old World         |
| <i>I. arborescens</i>       | (Humb. & Bonpl. ex Willd.) G.Don    | 2  | 0 |        | 23.3  | 53   | Devoid        |                                          |
| <i>I. argentaurata</i>      | Hallier f.                          | 2  | 0 |        | 9.1   | 8    |               |                                          |
| <i>I. argentea</i>          | Meisn.                              | 2  | 0 |        | -14   | 6    |               |                                          |
| <i>I. argillicola</i>       | R.W.Johnson                         | 6  | 6 | 113.8  | -20.3 | 77   | Positive      | W. & S. South America to Brazil          |
| <i>I. aristolochiifolia</i> | G.Don                               | 3  | 0 |        | 11.9  | 11   | Positive      |                                          |
| <i>I. aurantiaca</i> †      | L.O.Williams                        | 2  | 1 | 6.2    | 11.8  | 11   |               | SE. Mexico to C. America                 |
| <i>I. barbatisepala</i> †   | A.Gray                              | 2  | 2 | 56.2   | 31.8  | 24   |               | Arizona to Texas, W. Mexico              |
| <i>I. barteri</i>           | Baker                               | 2  | 0 |        | -15.5 | 55   |               |                                          |
| <i>I. batatoides</i> †      | Choisy                              | 3  | 1 | 3634.1 | -2.1  | 37   | Devoid        | Mexico to S. Trop. America               |
| <i>I. biflora</i>           | (L.) Pers.                          | 18 | 0 |        | -8.15 | 12.4 | Devoid        |                                          |
| <i>I. blepharophylla</i>    | Hallier f.                          | 1  | 0 |        | 9     | 14   |               |                                          |
| <i>I. bolusiana</i>         | Schinz                              | 2  | 0 |        | -22.6 | 22   |               |                                          |
| <i>I. bombycina</i>         | (Choisy) Benth. & Hook.f. ex Hemsl. | 2  | 0 |        | 5     | 26   |               |                                          |
| <i>I. bonariensis</i>       | Hook.                               | 1  | 0 |        | -27.1 | 33   | Devoid        |                                          |
| <i>I. brassii</i> †         | C.T.White                           | 1  | 1 | 19.9   | -18.6 | 29   |               | N. & NE. Australia                       |
| <i>I. cairica</i>           | (L.) Sweet                          | 8  | 0 |        | 1.3   | 34.1 | Contradictory |                                          |

|                                      |                                         |    |   |       |       |      |                                                 |
|--------------------------------------|-----------------------------------------|----|---|-------|-------|------|-------------------------------------------------|
| <i>I. calantha</i>                   | Griseb.                                 | 2  | 0 |       | 9.7   | 28   |                                                 |
| <i>I. calobra</i>                    | F.Muell.                                | 1  | 0 |       | -25.4 | 99   |                                                 |
| <i>I. campanulata</i>                | L.                                      | 1  | 0 |       | 18.8  | 9    |                                                 |
| <i>I. capillacea</i>                 | (Kunth) G.Don                           | 4  | 0 |       | 12.9  | 4    |                                                 |
| <i>I. carnea</i>                     | Jacq.                                   | 11 | 0 |       | 6.9   | 77.8 | Contradictory                                   |
| <i>I. cavalcantei</i>                | D.F.Austin                              | 1  | 0 |       | -5.3  | 20   |                                                 |
| <i>I. chiriquensis</i>               | Standl.                                 | 1  | 0 |       |       | 30   |                                                 |
| <i>I. cholulensis</i>                | Kunth                                   | 2  | 0 |       | 18.3  | 11   |                                                 |
| <i>I. chrysochaetia</i> <sup>†</sup> | Hallier f.                              | 2  | 2 | 19.5  | 8.6   | 11   | W. Trop. Africa to<br>South Sudan and<br>Angola |
| <i>I. cicatricosa</i> <sup>†</sup>   | Baker                                   | 3  | 2 | 242.2 | 1.9   | 36   | Ethiopia to Kenya                               |
| <i>I. clausa</i>                     | Rudolph ex Ledeb.                       | 1  | 0 |       | 19    | 8    |                                                 |
| <i>I. clavata</i>                    | (G.Don) Ooststr. ex<br>J.F.Macbr.       | 5  | 0 |       | 14    | 148  |                                                 |
| <i>I. coccinea</i>                   | L.                                      | 2  | 0 |       | 45.8  | 12   | Contradictory                                   |
| <i>I. coptica</i>                    | (L.) Roth ex Roem.<br>& Schult.         | 6  | 0 |       | -9.1  | 8    | Devoid                                          |
| <i>I. cordatotriloba</i>             | Dennst.                                 | 4  | 0 |       | 29.9  | 13.8 | Contradictory                                   |
| <i>I. coscinosperma</i>              | Hochst. ex Choisy                       | 2  | 0 |       | 8.6   | 7    | Devoid                                          |
| <i>I. costata</i>                    | F.Muell. ex Benth.                      | 2  | 0 |       | -15.1 | 114  | Positive                                        |
| <i>I. costellata</i>                 | Torr.                                   | 6  | 0 |       | 27.2  | 5.5  |                                                 |
| <i>I. crassipes</i>                  | Hook.                                   | 1  | 0 |       | -8.8  | 5    |                                                 |
| <i>I. crepidiformis</i>              | Hallier f.                              | 1  | 0 |       | -4.9  | 18   |                                                 |
| <i>I. cristulata</i>                 | Hallier f.                              | 3  | 0 |       | 33    | 11   |                                                 |
| <i>I. decasperma</i>                 | Hallier f.                              | 1  | 0 |       | 24    | 14   |                                                 |
| <i>I. diamantinensis</i>             | J.M.Black ex<br>Eardley in<br>J.M.Black | 4  | 0 |       | -23.8 | 100  | Positive                                        |
| <i>I. dichroa</i>                    | Hochst. ex Choisy                       | 6  | 0 |       | -1.6  | 10.5 | Devoid                                          |
| <i>I. digitata</i>                   | L.                                      | 3  | 0 |       | 7.5   | 26   |                                                 |
| <i>I. dubia</i>                      | Roem. & Schult.                         | 3  | 0 |       | -6    | 11   |                                                 |

|                                      |                                             |   |   |       |       |       |               |                                                                                                                 |
|--------------------------------------|---------------------------------------------|---|---|-------|-------|-------|---------------|-----------------------------------------------------------------------------------------------------------------|
| <i>I. dumetorum</i>                  | (Kunth) Willd.                              | 4 | 0 |       | 3.7   | 24    | Positive      |                                                                                                                 |
| <i>I. durangensis</i>                | House                                       | 1 | 0 |       | 24    | 9     |               |                                                                                                                 |
| <i>I. echinocalyx</i>                | Meisn.                                      | 1 | 0 |       | -18.1 | 204   |               |                                                                                                                 |
| <i>I. eggersiana</i>                 | Peter                                       | 1 | 0 |       | 17.7  | 14    |               |                                                                                                                 |
| <i>I. eriocarpa</i>                  | R.Br.                                       | 5 | 0 |       | -3.5  | 5     | Devoid        |                                                                                                                 |
| <i>I. ficifolia</i>                  | Lindl.                                      | 2 | 0 |       | -11.4 | 10    |               |                                                                                                                 |
| <i>I. fimbriosepala</i> <sup>†</sup> | Choisy                                      | 2 | 2 | 102.9 | -28.1 | 39    |               | WC. Trop. Africa,<br>W. Indian Ocean,<br>SE. China, New<br>Guinea to Pacific,<br>S. Mexico, S. Trop.<br>America |
| <i>I. fulvicaulis</i>                | (Hochst. ex Choisy)<br>Boiss. ex Hallier f. | 3 | 0 |       | -11.5 | 16.7  |               |                                                                                                                 |
| <i>I. gracilis</i>                   | R.Br.                                       | 2 | 2 | 131.6 | -19.8 | 20    |               | N. & NE. Australia                                                                                              |
| <i>I. graminea</i> <sup>†</sup>      | R.Br.                                       | 2 | 1 | 1.2   | -14   | 31    | Devoid        | C. Malesia to N.<br>Australia                                                                                   |
| <i>I. grandifolia</i>                | (Dammer) O'Donell                           | 1 | 0 |       | -25.6 | 17    |               |                                                                                                                 |
| <i>I. haenkeana</i>                  | Choisy                                      | 1 | 0 |       | -17.8 | 8     |               |                                                                                                                 |
| <i>I. hederacea</i>                  | Jacq.                                       | 5 | 0 |       | 36    | 33    | Contradictory |                                                                                                                 |
| <i>I. hederifolia</i>                | L.                                          | 5 | 0 |       | 0.4   | 10    |               |                                                                                                                 |
| <i>I. heptaphylla</i>                | Sweet                                       | 4 | 0 |       | -0.5  | 17.3  | Contradictory |                                                                                                                 |
| <i>I. heterodoxa</i>                 | Standl. & Steyerl.                          | 2 | 0 |       | 20.5  | 3     |               |                                                                                                                 |
| <i>I. heterotricha</i>               | Standl. & Steyerl.                          | 3 | 0 |       | 11.3  | 10    |               |                                                                                                                 |
| <i>I. hieronymi</i>                  | (Kuntze) O'Donell                           | 1 | 0 |       | -31.1 | 33    |               |                                                                                                                 |
| <i>I. hildebrandtii</i>              | Vatke                                       | 3 | 3 | 1501  | 1     | 105   | Positive      | Ethiopia to Rwanda<br>and Tanzania                                                                              |
| <i>I. hochstetteri</i>               | House                                       | 3 | 0 |       | -13.6 | 27    | Devoid        |                                                                                                                 |
| <i>I. holubii</i>                    | Baker                                       | 1 | 0 |       | -24.1 | 58    |               |                                                                                                                 |
| <i>I. imperati</i>                   | (Vahl) Griseb.                              | 9 | 0 |       | 15.7  | 70    | Positive      |                                                                                                                 |
| <i>I. incarnata</i> <sup>†</sup>     | (Vahl) Choisy                               | 1 | 1 | 22.9  | -12   | 20    |               | Curaçao to S. Trop.<br>America                                                                                  |
| <i>I. indica</i>                     | (Burm.) Merr.                               | 6 | 0 |       | 16.8  | 23.17 | Devoid        |                                                                                                                 |

|                                      |                         |    |    |        |       |       |               |                                                   |
|--------------------------------------|-------------------------|----|----|--------|-------|-------|---------------|---------------------------------------------------|
| <i>I. indivisa</i> <sup>†</sup>      | (Vell.) Hallier f.      | 2  | 1  | 45.8   | -14.4 | 7     |               | Bolivia to Brazil<br>and NE. Argentina            |
| <i>I. intrapilosa</i>                | Rose                    | 2  | 0  |        | 20.5  | 79    |               |                                                   |
| <i>I. involucrata</i>                | P.Beauv.                | 2  | 0  |        | 5.9   | 50    | Devoid        |                                                   |
| <i>I. jalapa</i>                     | (L.) Pursh              | 2  | 0  |        | 14.8  | 32    |               |                                                   |
| <i>I. keraudreniae</i>               | Deroin                  | 1  | 0  |        | -20   | 19    |               |                                                   |
| <i>I. killipiana</i> <sup>†</sup>    | O'Donnell               | 1  | 1  | 778    | 8.6   | 11    |               | Colombia, French<br>Guiana                        |
| <i>I. kituiensis</i> <sup>†</sup>    | Vatke                   | 3  | 3  | 1196.7 | -0.3  | 101   |               | Ethiopia to S. Trop.<br>Africa                    |
| <i>I. kotschyana</i>                 | Hochst. ex Choisy       | 4  | 0  |        | 13.4  | 4     |               |                                                   |
| <i>I. lacunosa</i>                   | L.                      | 1  | 0  |        | 30    | 19    | Contradictory |                                                   |
| <i>I. lapathifolia</i>               | Hallier f.              | 4  | 0  |        | -8    | 7     |               |                                                   |
| <i>I. lapidosa</i>                   | Vatke                   | 1  | 0  |        | 1     | 123   |               |                                                   |
| <i>I. leptophylla</i>                | Torr.                   | 24 | 24 | 27.4   | 40.6  | 79    | Positive      | W. & WC. U.S.A.                                   |
| <i>I. × leucantha</i>                | Jacq.                   | 1  | 0  |        | 23.4  | 6     |               |                                                   |
| <i>I. leucanthemum</i>               | (Klotzsch) Hallier f.   | 1  | 0  |        | -13.5 | 11    |               |                                                   |
| <i>I. leucotricha</i> <sup>†</sup>   | Donn.Sm.                | 1  | 1  | 31     | 10.3  | 23    |               | SE. Mexico to C.<br>America                       |
| <i>I. lindenii</i> <sup>†</sup>      | M.Martens &<br>Galeotti | 2  | 1  | 87.1   | 11.7  | 28    |               | Mexico to<br>Venezuela and W.<br>Bolivia, Jamaica |
| <i>I. lindheimeri</i>                | A.Gray                  | 3  | 0  |        | 30.6  | 40    | Devoid        |                                                   |
| <i>I. linosepala</i>                 | Hallier f.              | 3  | 0  |        | -8.7  | 5.7   |               |                                                   |
| <i>I. lonchophylla</i>               | J.M.Black               | 6  | 0  |        | -23.7 | 18    |               |                                                   |
| <i>I. longifolia</i>                 | Benth.                  | 2  | 0  |        | 24.8  | 118   |               |                                                   |
| <i>I. longituba</i>                  | Hallier f.              | 1  | 0  |        | -23.4 | 28    |               |                                                   |
| <i>I. lutea</i>                      | Hemsl.                  | 1  | 0  |        | 17.4  | 11    |               |                                                   |
| <i>I. luteoviridis</i>               | Ekman & Leonard         | 1  | 0  |        | 19.9  | 6     |               |                                                   |
| <i>I. malvaeoides</i>                | Meisn.                  | 2  | 0  |        | -25.2 | 30    |               |                                                   |
| <i>I. marmorata</i>                  | Britten & Rendle        | 1  | 0  |        | 8.6   | 213   |               |                                                   |
| <i>I. maurandioides</i> <sup>†</sup> | Meisn.                  | 4  | 2  | 321.4  | -14.6 | 15.25 |               | Bolivia to Brazil<br>and NE. Argentina            |

|                                   |                                  |     |    |       |       |       |               |                               |
|-----------------------------------|----------------------------------|-----|----|-------|-------|-------|---------------|-------------------------------|
| <i>I. mauritiana</i> <sup>†</sup> | Jacq.                            | 6   | 1  | 7.2   | 3.4   | 19    | Devoid        | Trop. America,<br>Africa      |
| <i>I. meyeri</i>                  | (Spreng.) G.Don                  | 3   | 0  |       | 11.7  | 5     | Devoid        |                               |
| <i>I. minutiflora</i>             | (M.Martens &<br>Galeotti) House  | 4   | 0  |       | 15.3  | 2     | Positive      |                               |
| <i>I. mombassana</i>              | Vatke                            | 2   | 0  |       | -6.7  | 7     |               |                               |
| <i>I. muelleri</i>                | Benth.                           | 15  | 15 | 97.1  | -19.7 | 49    | Positive      | Australia                     |
| <i>I. muricata</i>                | (L.) Jacq.                       | 7   | 0  |       | 26.9  | 149.4 | Contradictory |                               |
| <i>I. murucoides</i>              | Roem. & Schult.                  | 7   | 0  |       | 4.9   | 154.6 | Devoid        |                               |
| <i>I. neei</i>                    | (Spreng.) O'Donell               | 3   | 0  |       | 16    | 12    |               |                               |
| <i>I. nil</i>                     | (L.) Roth                        | 7   | 0  |       | 17.7  | 26.6  | Contradictory |                               |
| <i>I. obscura</i>                 | (L.) Ker Gawl.                   | 5   | 0  |       | -7.9  | 19    | Devoid        |                               |
| <i>I. ochracea</i>                | (Lindl.) Sweet                   | 6   | 0  |       | 5.5   | 22.5  |               |                               |
| <i>I. oenotherae</i>              | (Vatke) Hallier f.               | 1   | 0  |       | 0.1   | 6     |               |                               |
| <i>I. opulifolia</i>              | Rusby                            | 1   | 0  |       | -17.6 | 56    |               |                               |
| <i>I. orizabensis</i>             | (G.Pelletan) Ledeb.<br>ex Steud. | 1   | 0  |       |       | 56    | Positive      |                               |
| <i>I. paludosa</i>                | O'Donell                         | 1   | 0  |       |       | 10    |               |                               |
| <i>I. pandurata</i>               | (L.) G.Mey.                      | 5   | 0  |       | 35.5  | 25    |               |                               |
| <i>I. papilio</i>                 | Hallier f.                       | 3   | 0  |       | -18   | 9     |               |                               |
| <i>I. parasitica</i>              | (Kunth) G.Don                    | 12  | 7  | 919.1 | 15.2  | 43    | Positive      | Mexico to Brazil              |
| <i>I. passifloroides</i>          | House                            | 1   | 0  |       | 19.3  | 9     |               |                               |
| <i>I. pauciflora</i>              | M.Martens &<br>Galeotti          | 5   | 0  |       | 16.7  | 74    |               |                               |
| <i>I. pedicellaris</i>            | Benth.                           | 5   | 0  |       | 24.4  | 92    | Positive      |                               |
| <i>I. pes-caprae</i>              | (L.) R.Br.                       | 101 | 94 | 10.9  | 17.9  | 110   | Positive      | Coasts of Trop. &<br>Subtrop. |
| <i>I. pes-tigridis</i>            | L.                               | 4   | 0  |       | 14.6  | 28    |               |                               |
| <i>I. peteri</i>                  | (Kuntze) Staples &<br>Govaerts   | 2   | 0  |       | 16.9  | 7     |               |                               |
| <i>I. philomega</i>               | (Vell.) House                    | 5   | 1  | 136.3 | 12.3  | 14    | Positive      | S. Mexico to Trop.<br>America |



|                            |                          |   |   |        |       |      |               |                               |
|----------------------------|--------------------------|---|---|--------|-------|------|---------------|-------------------------------|
| <i>I. pileata</i> †        | Roxb.                    | 6 | 1 | 11.9   | 2.8   | 12   |               | Trop. & Subtrop.<br>Old World |
| <i>I. pinifolia</i>        | Meisn.                   | 1 | 0 |        | -15.8 | 80   |               |                               |
| <i>I. platensis</i>        | Ker Gawl.                | 1 | 0 |        | -29.2 | 5    |               |                               |
| <i>I. plummerae</i>        | A.Gray                   | 1 | 0 |        | -16.5 | 17   |               |                               |
| <i>I. polpha</i>           | R.W.Johnson              | 1 | 0 |        | -17.1 | 99   |               |                               |
| <i>I. polymorpha</i>       | Roem. & Schult.          | 9 | 0 |        | -8.4  | 5.7  |               |                               |
| <i>I. populina</i>         | House                    | 2 | 0 |        | 13.2  | 65   |               |                               |
| <i>I. porphyrea</i> †      | J.R.I.Wood &<br>Scotland | 1 | 1 | 43.5   | -22.2 | 83   |               | Madagascar                    |
| <i>I. praecana</i>         | House                    | 4 | 0 |        | 13.6  | 58   |               |                               |
| <i>I. praematura</i>       | Eckenw.                  | 1 | 0 |        |       | 10   |               |                               |
| <i>I. prismatosyphon</i> † | Welw.                    | 2 | 1 | 1.7    | -3.1  | 71   |               | Trop. Africa                  |
| <i>I. pubescens</i>        | Lam.                     | 2 | 0 |        | 26.2  | 47   |               |                               |
| <i>I. purpurea</i>         | (L.) Roth                | 5 | 0 |        | 11.4  | 27   | Contradictory |                               |
| <i>I. quamoclit</i>        | L.                       | 8 | 0 |        | 14.4  | 11   | Contradictory |                               |
| <i>I. racemigera</i>       | F.Muell. & Tate          | 3 | 0 |        | -23.3 | 32   |               |                               |
| <i>I. racemosa</i> †       | Poir.                    | 2 | 2 | 1068.4 | 20.6  | 72   |               | Cuba to Hispaniola            |
| <i>I. ramosissima</i>      | (Poir.) Choisy           | 5 | 0 |        | 5.6   | 10   | Devoid        |                               |
| <i>I. recta</i>            | De Wild.                 | 2 | 0 |        | -13.6 | 5    |               |                               |
| <i>I. regnellii</i>        | Meisn.                   | 1 | 0 |        | 7.9   | 31   | Devoid        |                               |
| <i>I. repanda</i>          | Jacq.                    | 1 | 0 |        | 16.2  | 8    |               |                               |
| <i>I. rubens</i>           | Choisy                   | 6 | 0 |        | 9.1   | 23.8 | Devoid        |                               |
| <i>I. rubriflora</i>       | O'Donell                 | 1 | 0 |        | -24.2 | 9    |               |                               |
| <i>I. sagittata</i>        | Poir.                    | 4 | 0 |        | 29.5  | 51   |               |                               |
| <i>I. sagittifolia</i>     | Burm.f.                  | 6 | 0 |        | -0.95 | 11.8 | Devoid        |                               |
| <i>I. saintronanensis</i>  | R.W.Johnson              | 1 | 0 |        |       | 156  |               |                               |
| <i>I. santillanii</i>      | O'Donell                 | 1 | 0 |        | 13.8  | 182  |               |                               |
| <i>I. saopaulista</i>      | O'Donell                 | 2 | 0 |        | -11.3 | 4    |               |                               |
| <i>I. schomburgkii</i>     | Choisy                   | 2 | 0 |        | 8.9   | 18   |               |                               |

|                           |                                  |   |   |       |       |       |          |                               |
|---------------------------|----------------------------------|---|---|-------|-------|-------|----------|-------------------------------|
| <i>I. sepacuitensis</i>   | Donn.Sm.                         | 1 | 0 |       | 17.2  | 178   |          |                               |
| <i>I. sericosepala</i> †  | J.R.I.Wood &<br>Scotland         | 3 | 3 | 54.9  | -10.1 | 44.3  |          | Peru to Brazil                |
| <i>I. setifera</i>        | Poir.                            | 5 | 4 | 67.8  | 8.5   | 31    | Positive | S. Mexico to Trop.<br>America |
| <i>I. setosa</i>          | Ker Gawl.                        | 4 | 0 |       | 13.8  | 79    | Devoid   |                               |
| <i>I. shirambensis</i>    | Baker                            | 4 | 0 |       | -12.8 | 19    | Devoid   |                               |
| <i>I. shupangensis</i>    | Baker                            | 1 | 0 |       | -8.3  | 35    |          |                               |
| <i>I. simonsiana</i>      | Rendle                           | 2 | 0 |       | -15.2 | 8     |          |                               |
| <i>I. spathulata</i> †    | Hallier f.                       | 2 | 1 | 67.2  | 5.2   | 39    |          | Ethiopia to Uganda            |
| <i>I. splendor-sylvae</i> | House                            | 4 | 0 |       | 12.0  | 7.5   |          |                               |
| <i>I. squamisepala</i>    | O'Donnell                        | 1 | 0 |       | 25.2  | 8     |          |                               |
| <i>I. squamosa</i>        | Choisy                           | 4 | 0 |       | 13.7  | 24    |          |                               |
| <i>I. stans</i> †         | Cav.                             | 2 | 2 | 23.7  | 18.9  | 47    |          | Mexico                        |
| <i>I. steerei</i>         | (Standl.)<br>L.O.Williams        | 2 | 0 |       | 19.2  | 11    |          |                               |
| <i>I. stenobasis</i> †    | Brenan                           | 2 | 2 | 8     | 7.7   | 36    |          | W. Trop. Africa to<br>Uganda  |
| <i>I. stenosphon</i>      | Hallier f.                       | 4 | 0 |       | -11.0 | 127.5 |          |                               |
| <i>I. suaveolens</i>      | (M.Martens &<br>Galeotti) Hemsl. | 2 | 0 |       | 15.3  | 2     |          |                               |
| <i>I. subrevoluta</i>     | Choisy                           | 1 | 0 |       | -14.8 | 71    |          |                               |
| <i>I. sulphurea</i>       | (La Llave) G.Don                 | 1 | 0 |       |       | 9     |          |                               |
| <i>I. syringifolia</i> †  | Meisn.                           | 2 | 2 | 142.5 | -25.9 | 15    |          | Brazil to NE.<br>Argentina    |
| <i>I. tenuipes</i>        | Verdc.                           | 2 | 0 |       | -15.5 | 18    |          |                               |
| <i>I. tenuirostris</i>    | Choisy                           | 4 | 0 |       | 2.4   | 8     |          |                               |
| <i>I. ternata</i>         | Jacq.                            | 1 | 0 |       | 18.1  | 12    |          |                               |
| <i>I. ternifolia</i>      | Cav.                             | 2 | 0 |       | 18.8  | 6.5   | Devoid   |                               |
| <i>I. tiliacea</i>        | (Willd.) Choisy                  | 1 | 0 |       | 11.1  | 6     |          |                               |
| <i>I. tricolor</i>        | Cav.                             | 2 | 2 | 164.6 | 9.7   | 28    | Positive | Mexico                        |
| <i>I. trifida</i>         | (Kunth) G.Don                    | 3 | 0 |       | 13.4  | 4     |          |                               |

|                        |                              |   |   |        |       |     |          |                                                       |
|------------------------|------------------------------|---|---|--------|-------|-----|----------|-------------------------------------------------------|
| <i>I. triloba</i>      | L.                           | 7 | 0 |        | 13.3  | 13  | Devoid   |                                                       |
| <i>I. tuboides</i>     | O.Degr. & Ooststr.           | 1 | 0 |        |       | 105 |          |                                                       |
| <i>I. urbaniana</i> †  | (Dammer) Hallier f.          | 5 | 4 | 2858.4 | -4.3  | 31  |          | EC. & E. Trop.<br>Africa                              |
| <i>I. verbascoidea</i> | Choisy                       | 6 | 0 |        | -19   | 56  | Devoid   |                                                       |
| <i>I. villifera</i>    | House                        | 1 | 0 |        | 15.3  | 41  |          |                                                       |
| <i>I. violacea</i>     | L.                           | 5 | 0 |        | -4.2  | 172 | Devoid   |                                                       |
| <i>I. welwitschii</i>  | Vatke ex Hallier f.          | 1 | 0 |        | -13.5 | 15  |          |                                                       |
| <i>I. wightii</i>      | (Wall.) Choisy               | 4 | 0 |        | -7.1  | 11  |          |                                                       |
| <i>I. wolcottiana</i>  | Rose                         | 2 | 0 |        | 16.5  | 35  |          |                                                       |
| <i>J. paniculata</i>   | (Burm.f.) Hallier f.         | 2 | 0 |        | -20.2 | 16  |          |                                                       |
| <i>M. hirta</i>        | (L.) Merr.                   | 1 | 0 |        | 23.2  | 36  | Devoid   |                                                       |
| <i>P. shirensis</i> †  | (Oliv.) Lejoly &<br>Lisowski | 3 | 1 | 55.9   | -15.3 | 10  |          | S. DR Congo to E.<br>South Africa                     |
| <i>S. beraviensis</i>  | (Vatke) Hallier f.           | 2 | 2 | 1133.3 | -7.8  | 38  | Positive | Trop. Africa to<br>Botswana,<br>Madagascar<br>Somalia |
| <i>S. macalusoii</i> † | (Mattei) Verdc.              | 1 | 1 | 1601.4 | 18    | 209 |          |                                                       |
| <i>S. mojangensis</i>  | (Vatke) D.F.Austin<br>& Eich | 1 | 0 |        | -18.6 | 7   |          |                                                       |
| <i>S. tiliifolia</i>   | (Desr.) Hallier f.           | 2 | 2 | 1213.9 | 11    | 233 | Positive | Trop. & Subtrop.<br>Asia to Pacific                   |

† New species identified with ergot alkaloids

**Table S2.** Species in Eich (2008) absent from our sampling but are included in the ITS phylogeny.

| Species                 | Authority               | Previous Designation (Eich 2008) | Geographical Distribution                 |
|-------------------------|-------------------------|----------------------------------|-------------------------------------------|
| <i>A. cuneata</i>       | (Willd.) Ker Gawl.      | Positive                         | India                                     |
| <i>A. hookeri</i>       | C.B. Clarke             | Positive                         | Nepal to Thailand, Andaman Is.            |
| <i>A. mollis</i>        | (Burm f.) Choisy        | Positive                         | Bangladesh to Hainan and Lesser Sunda Is. |
| <i>A. ridleyi</i>       | (Prain) Ooststr.        | Positive                         | Pen. Malaysia to Sumatera                 |
| <i>A. wallichii</i>     | Choisy                  | Positive                         | Sikkim to SC. China and N. Indo-China     |
| <i>I. asarifolia</i>    | (Desr.) Roem. & Schult. | Positive                         | Tropics                                   |
| <i>I. batatas</i>       | (L.) Lam.               | Devoid                           |                                           |
| <i>I. bracteata</i>     | Cav.                    | Devoid                           |                                           |
| <i>I. cardiophylla</i>  | A. Gray                 | Positive                         | Arizona to Texas and Mexico               |
| <i>I. chloroneura</i>   | Hallier f.              | Devoid                           |                                           |
| <i>I. corymbosa</i>     | (L.) Roth               | Positive                         | Mexico to Trop. America                   |
| <i>I. cynanchifolia</i> | Meisn.                  | Devoid                           |                                           |
| <i>I. jujuyensis</i>    | O'Donell                | Positive                         | Ecuador to NW. Argentina                  |
| <i>I. lobata</i>        | (Cerv.) Thell.          | Contradictory                    |                                           |
| <i>I. marginisepala</i> | O'Donell                | Positive                         | S. Bolivia to NW. Argentina               |
| <i>I. microsepala</i>   | Benth.                  | Devoid                           |                                           |
| <i>I. mirandina</i>     | (Pittier) O'Donell      | Devoid                           |                                           |
| <i>I. reticulata</i>    | O'Donell                | Devoid                           |                                           |
| <i>S. laxiflora</i>     | (Baker) Hallier f.      | Positive                         | Tanzania to E. South Africa, Madagascar   |

**Table S3.** Accession information of all sequences included in the ITS phylogeny.

| Accession             | Species                         | Accession  | Species                         |
|-----------------------|---------------------------------|------------|---------------------------------|
| AF110918.1            | <i>Ipomoea diamantinensis</i>   | MN825395.1 | <i>Ipomoea lacunosa</i>         |
| AF110926.1            | <i>Ipomoea saintronanensis</i>  | MN825400.1 | <i>Ipomoea lapathifolia</i>     |
| AF110938.1            | <i>Ipomoea batatas</i>          | MN825401.1 | <i>Ipomoea lapidosa</i>         |
| AF309151.1            | <i>Argyrea splendens</i>        | MN825406.1 | <i>Ipomoea leptophylla</i>      |
| AF309152.1            | <i>Argyrea capitiformis</i>     | MN825410.1 | <i>Ipomoea x leucantha</i>      |
| AF309153.1            | <i>Argyrea nervosa</i>          | MN825416.1 | <i>Ipomoea leucanthemum</i>     |
| AF309154.1            | <i>Ipomoea eriocarpa</i>        | MN825418.1 | <i>Ipomoea leucotricha</i>      |
| AF309155.1            | <i>Stictocardia tiliifolia</i>  | MN825423.1 | <i>Ipomoea lindenii</i>         |
| AF309156.1            | <i>Stictocardia beraviensis</i> | MN825428.1 | <i>Ipomoea lindheimeri</i>      |
| AF309160.1            | <i>Ipomoea holubii</i>          | MN825433.1 | <i>Ipomoea linosepala</i>       |
| AY538299.1+MN825462.1 | <i>Ipomoea lutea</i>            | MN825440.1 | <i>Ipomoea lobata</i>           |
| AY538328.1+MG910327.1 | <i>Ipomoea ternifolia</i>       | MN825451.1 | <i>Ipomoea longifolia</i>       |
| DQ355317.1            | <i>Ipomoea sepacuitensis</i>    | MN825455.1 | <i>Ipomoea longituba</i>        |
| JX974573.1            | <i>Argyrea cuneata</i>          | MN825486.1 | <i>Ipomoea malvaeoides</i>      |
| KP261910.1            | <i>Argyrea henryi</i>           | MN825496.1 | <i>Ipomoea marginisepala</i>    |
| KP261991.1            | <i>Merremia verruculosa</i>     | MN825497.1 | <i>Ipomoea marmorata</i>        |
| KP261994.1            | <i>Merremia gemella</i>         | MN825505.1 | <i>Ipomoea maurandioides</i>    |
| KP261997.1            | <i>Merremia incisa</i>          | MN825509.1 | <i>Ipomoea mauritiana</i>       |
| KU201949.1            | <i>Stictocardia macalusoii</i>  | MN825523.1 | <i>Ipomoea meyeri</i>           |
| MH189757.1            | <i>Ipomoea hederacea</i>        | MN825528.1 | <i>Ipomoea microsepala</i>      |
| MH768129.1            | <i>Ipomoea violacea</i>         | MN825531.1 | <i>Ipomoea minutiflora</i>      |
| MH825855.1            | <i>Merremia hederacea</i>       | MN825535.1 | <i>Ipomoea mirandina</i>        |
| MN824770.1            | <i>Ipomoea abrupta</i>          | MN825537.1 | <i>Stictocardia mojangensis</i> |
| MN824775.1            | <i>Ipomoea abutiloides</i>      | MN825549.1 | <i>Ipomoea muelleri</i>         |
| MN824781.1            | <i>Ipomoea acanthocarpa</i>     | MN825552.1 | <i>Ipomoea muricata</i>         |
| MN824786.1            | <i>Ipomoea aculeata</i>         | MN825561.1 | <i>Ipomoea murucoides</i>       |
| MN824789.1            | <i>Ipomoea adenioides</i>       | MN825563.1 | <i>Ipomoea neei</i>             |
| MN824790.1            | <i>Ipomoea alba</i>             | MN825574.1 | <i>Ipomoea nil</i>              |
| MN824793.1            | <i>Ipomoea albivenia</i>        | MN825589.1 | <i>Ipomoea obscura</i>          |
| MN824804.1            | <i>Ipomoea amnicola</i>         | MN825591.1 | <i>Argyrea obtusifolia</i>      |
| MN824815.1            | <i>Ipomoea aquatica</i>         | MN825593.1 | <i>Ipomoea ochracea</i>         |
| MN824818.1            | <i>Ipomoea arborescens</i>      | MN825599.1 | <i>Ipomoea oenotherae</i>       |
| MN824825.1            | <i>Ipomoea argenteaurata</i>    | MN825608.1 | <i>Ipomoea opulifolia</i>       |
| MN824828.1            | <i>Ipomoea argentea</i>         | MN825618.1 | <i>Ipomoea orizabensis</i>      |
| MN824840.1+MN824841.1 | <i>Ipomoea argillicola</i>      | MN825628.1 | <i>Argyrea osyrensis</i>        |

|                       |                                  |                       |                               |
|-----------------------|----------------------------------|-----------------------|-------------------------------|
| MN824843.1            | <i>Ipomoea aristolochiifolia</i> | MN825640.1            | <i>Ipomoea paludosa</i>       |
| MN824852.1            | <i>Ipomoea asarifolia</i>        | MN825641.1            | <i>Ipomoea pandurata</i>      |
| MN824861.1            | <i>Ipomoea aurantiaca</i>        | MN825647.1            | <i>Ipomoea papilio</i>        |
| MN824874.1            | <i>Ipomoea barbatisepala</i>     | MN825650.1            | <i>Ipomoea parasitica</i>     |
| MN824875.1            | <i>Ipomoea barteri</i>           | MN825656.1+MN825655.1 | <i>Ipomoea pauciflora</i>     |
| MN824950.1            | <i>Ipomoea batatoides</i>        | MN825660.1            | <i>Ipomoea pedicellaris</i>   |
| MN824966.1            | <i>Ipomoea biflora</i>           | MN825668.1            | <i>Ipomoea pes-caprae</i>     |
| MN824972.1            | <i>Ipomoea blepharophylla</i>    | MN825672.1            | <i>Ipomoea pes-tigridis</i>   |
| MN824974.1            | <i>Ipomoea bolusiana</i>         | MN825674.1            | <i>Ipomoea peteri</i>         |
| MN824976.1+MN824977.1 | <i>Ipomoea bombycina</i>         | MN825681.1            | <i>Ipomoea philomega</i>      |
| MN824979.1            | <i>Ipomoea bonariensis</i>       | MN825688.1            | <i>Ipomoea pileata</i>        |
| MN824986.1            | <i>Ipomoea bracteata</i>         | MN825693.1            | <i>Ipomoea pinifolia</i>      |
| MN824998.1            | <i>Ipomoea brassii</i>           | MN825698.1            | <i>Ipomoea platensis</i>      |
| MN825002.1            | <i>Stictocardia laxiflora</i>    | MN825704.1            | <i>Ipomoea plummerae</i>      |
| MN825010.1            | <i>Ipomoea cairica</i>           | MN825710.1            | <i>Ipomoea polpha</i>         |
| MN825012.1            | <i>Ipomoea calobra</i>           | MN825715.1            | <i>Ipomoea polymorpha</i>     |
| MN825019.1            | <i>Ipomoea campanulata</i>       | MN825716.1            | <i>Ipomoea populina</i>       |
| MN825020.1            | <i>Ipomoea capillacea</i>        | MN825717.1            | <i>Ipomoea porphyrea</i>      |
| MN825024.1            | <i>Ipomoea cardiophylla</i>      | MN825718.1            | <i>Ipomoea praecana</i>       |
| MN825025.1            | <i>Ipomoea carnea</i>            | MN825722.1            | <i>Ipomoea prismatosyphon</i> |
| MN825046.1            | <i>Ipomoea chiriquensis</i>      | MN825742.1            | <i>Ipomoea pubescens</i>      |
| MN825047.1            | <i>Ipomoea chloroneura</i>       | MN825753.1            | <i>Ipomoea purpurea</i>       |
| MN825050.1            | <i>Ipomoea cholulensis</i>       | MN825758.1            | <i>Ipomoea quamoclit</i>      |
| MN825053.1            | <i>Ipomoea cicatricosa</i>       | MN825776.1            | <i>Ipomoea ramosissima</i>    |
| MN825059.1            | <i>Ipomoea clausa</i>            | MN825783.1            | <i>Ipomoea regnellii</i>      |
| MN825063.1            | <i>Ipomoea clavata</i>           | MN825786.1            | <i>Ipomoea repanda</i>        |
| MN825067.1            | <i>Ipomoea coccinea</i>          | MN825789.1            | <i>Ipomoea reticulata</i>     |
| MN825074.1            | <i>Ipomoea coptica</i>           | MN825792.1            | <i>Argyreia ridleyi</i>       |
| MN825100.1            | <i>Ipomoea cordatotriloba</i>    | MN825799.1            | <i>Argyreia roseopurpurea</i> |
| MN825107.1            | <i>Ipomoea corymbosa</i>         | MN825801.1            | <i>Ipomoea rubens</i>         |
| MN825112.1            | <i>Ipomoea coscinosperma</i>     | MN825811.1            | <i>Ipomoea rubriflora</i>     |
| MN825113.1            | <i>Ipomoea costata</i>           | MN825819.1            | <i>Ipomoea sagittata</i>      |
| MN825119.1            | <i>Ipomoea costellata</i>        | MN825821.1            | <i>Ipomoea sagittifolia</i>   |
| MN825122.1            | <i>Ipomoea crassipes</i>         | MN825825.1            | <i>Ipomoea santillanii</i>    |
| MN825127.1            | <i>Ipomoea crepidiformis</i>     | MN825826.1            | <i>Ipomoea saopaulista</i>    |
| MN825132.1            | <i>Ipomoea cristulata</i>        | MN825827.1+MN825828.1 | <i>Ipomoea schomburgkii</i>   |
| MN825157.1            | <i>Ipomoea cynanchifolia</i>     | MN825849.1            | <i>Argyreia mollis</i>        |

|                       |                              |                       |                                |
|-----------------------|------------------------------|-----------------------|--------------------------------|
| MN825164.1+MN825168.1 | <i>Ipomoea decasperma</i>    | MN825853.1            | <i>Ipomoea sericosepala</i> vo |
| MN825187.1            | <i>Ipomoea dichroa</i>       | MN825861.1+MF171727.1 | <i>Ipomoea setifera</i>        |
| MN825191.1            | <i>Ipomoea dubia</i>         | MN825866.1            | <i>Ipomoea setosa</i>          |
| MN825195.1            | <i>Ipomoea dumetorum</i>     | MN825870.1            | <i>Ipomoea shirambensis</i>    |
| MN825205.1            | <i>Ipomoea echinocalyx</i>   | MN825877.1            | <i>Ipomoea shupangensis</i>    |
| MN825207.1            | <i>Ipomoea eggersiana</i>    | MN825884.1            | <i>Ipomoea simonsiana</i>      |
| MN825223.1            | <i>Ipomoea ficifolia</i>     | MN825892.1            | <i>Ipomoea spathulata</i>      |
| MN825224.1            | <i>Ipomoea fimbriosepala</i> | MN825894.1            | <i>Ipomoea splendor-sylvae</i> |
| MN825227.1            | <i>Ipomoea fulvicaulis</i>   | MN825897.1            | <i>Ipomoea squamisepala</i>    |
| MN825242.1            | <i>Ipomoea gracilis</i>      | MN825903.1            | <i>Ipomoea squamosa</i>        |
| MN825244.1            | <i>Ipomoea graminea</i>      | MN825905.1            | <i>Ipomoea stans</i>           |
| MN825246.1+MN825247.1 | <i>Ipomoea grandifolia</i>   | MN825907.1            | <i>Argyrea wallichii</i>       |
| MN825273.1            | <i>Ipomoea haenkeana</i>     | MN825911.1            | <i>Ipomoea stenobasis</i>      |
| MN825290.1            | <i>Ipomoea hederifolia</i>   | MN825914.1            | <i>Ipomoea stenosphon</i>      |
| MN825300.1            | <i>Ipomoea heptaphylla</i>   | MN825927.1            | <i>Ipomoea subrevoluta</i>     |
| MN825303.1            | <i>Ipomoea heterodoxa</i>    | MN825939.1            | <i>Ipomoea syringifolia</i>    |
| MN825306.1            | <i>Ipomoea heterotricha</i>  | MN825952.1+MN825953.1 | <i>Ipomoea tenuipes</i>        |
| MN825308.1            | <i>Ipomoea hieronymi</i>     | MN825955.1            | <i>Ipomoea tenuirostris</i>    |
| MN825311.1            | <i>Argyrea hookeri</i>       | MN825961.1            | <i>Ipomoea ternata</i>         |
| MN825315.1            | <i>Ipomoea hochstetteri</i>  | MN825967.1            | <i>Ipomoea tiliacea</i>        |
| MN825327.1            | <i>Ipomoea imperati</i>      | MN825985.1            | <i>Ipomoea tricolor</i>        |
| MN825334.1            | <i>Ipomoea incarnata</i>     | MN825986.1            | <i>Ipomoea trifida</i>         |
| MN825347.1            | <i>Ipomoea indica</i>        | MN825999.1            | <i>Ipomoea triloba</i>         |
| MN825355.1            | <i>Ipomoea intrapilosa</i>   | MN826015.1            | <i>Ipomoea tuboides</i>        |
| MN825357.1            | <i>Ipomoea involucrata</i>   | MN826024.1            | <i>Ipomoea urbaniana</i>       |
| MN825368.1            | <i>Ipomoea jalapa</i>        | MN826033.1            | <i>Ipomoea verbascoidea</i>    |
| MN825372.1            | <i>Ipomoea jujuyensis</i>    | MN826037.1            | <i>Ipomoea villifera</i>       |
| MN825376.1            | <i>Ipomoea keraudreniae</i>  | MN826048.1            | <i>Ipomoea welwitschii</i>     |
| MN825378.1            | <i>Ipomoea kituiensis</i>    | MN826050.1            | <i>Ipomoea wightii</i>         |
| MN825379.1            | <i>Argyrea kleiniana</i>     | MN826051.1            | <i>Ipomoea wolcottiana</i>     |
| MN825380.1            | <i>Ipomoea kotschyana</i>    |                       |                                |

**Supplementary Dataset 1.** All herbarium specimens used in the study. Available at <https://doi.org/10.6084/m9.figshare.14749512>.
